# Supplementary material for: Autophagy promotes resistance to photodynamic therapy-induced apoptosis selectively in colorectal cancer stem-like cells
Source: PubMed Central journal article supplement — Autophagy. 2014 Apr 29;10(7):1179–92. doi: 10.4161/auto.28679 (PMC4203546; doi:10.4161/auto.28679), 2014-04-29
Supplement: auto-10-1179-s01.pdf [file auto-10-1179-s01.pdf]

## **Supplemental Material to:**

**Ming-Feng Wei, Min-Wei Chen, Ke-Cheng Chen,  
Pei-Jen Lou, Susan Yun-Fan Lin, Shih-Chieh Hung,  
Michael Hsiao, Cheng-Jung Yao, and Ming-Jium Shieh**

**Autophagy promotes resistance to photodynamic  
therapy-induced apoptosis selectively in colorectal cancer  
stem-like cells**

**Autophagy 2014; 10(7)**

**<http://dx.doi.org/10.4161/auto.28679>**

**[www.landesbioscience.com/journals/autophagy/article/28679](http://www.landesbioscience.com/journals/autophagy/article/28679)**

A

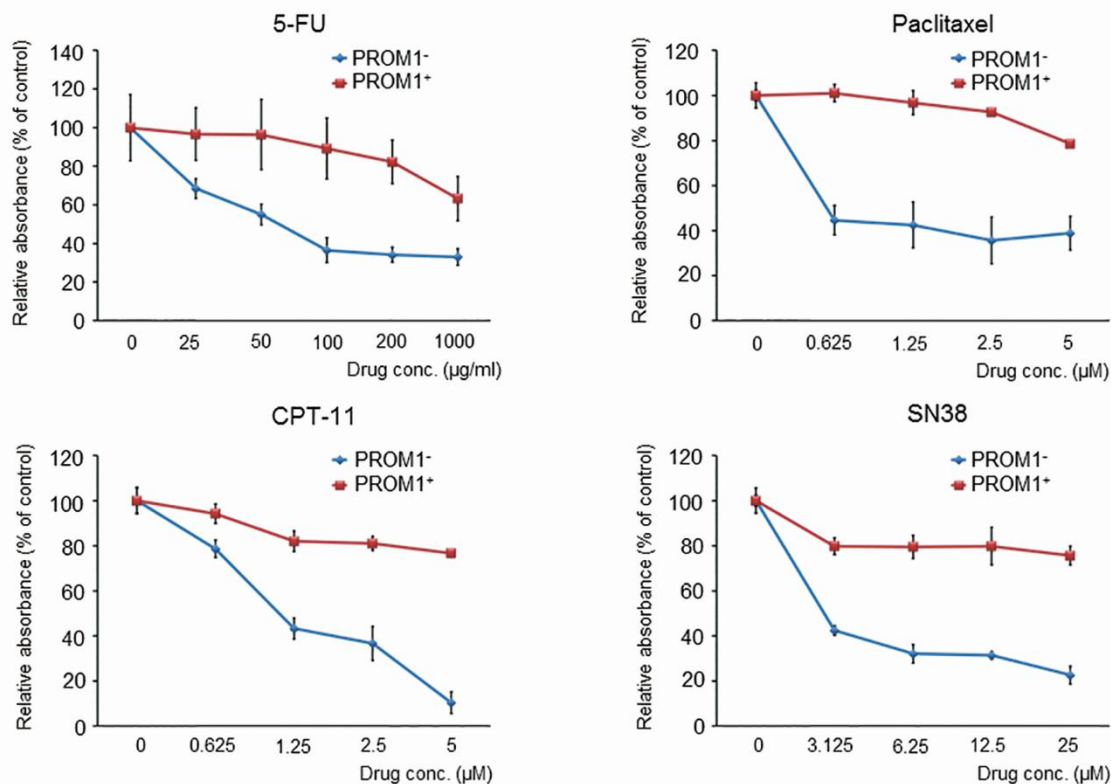

B

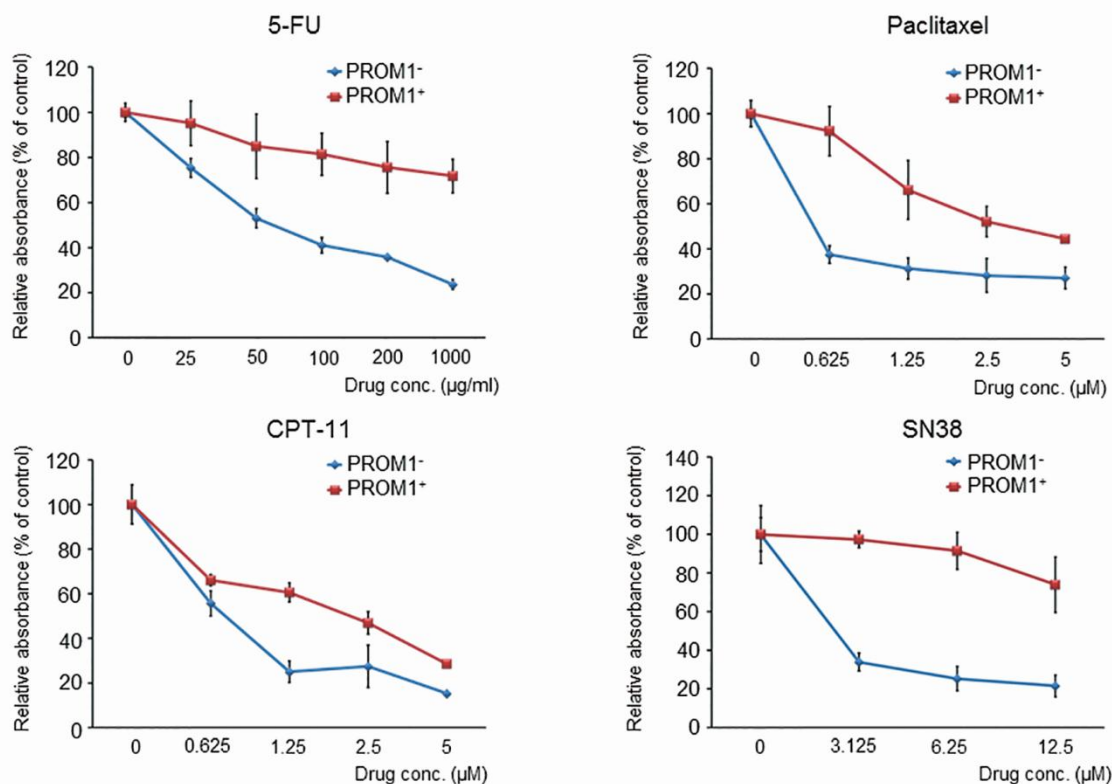

**Figure S1.** CSCs are more resistant to conventional chemotherapy compared to non-CSCs. PROM1/CD133<sup>+</sup> and PROM1/CD133<sup>-</sup> cells obtained from (A) PCCs and (B) HT29 cell line were first treated separately with increasing concentrations of various chemotherapeutic compounds for 72 h. These compounds included 5-FU, paclitaxel, CPT-11, and SN38. Thereafter, cytotoxicity was measured using the WST-1 assay. Cytotoxicity of treated cells was expressed as a percentage of the control. Each condition was performed at least in triplicate.

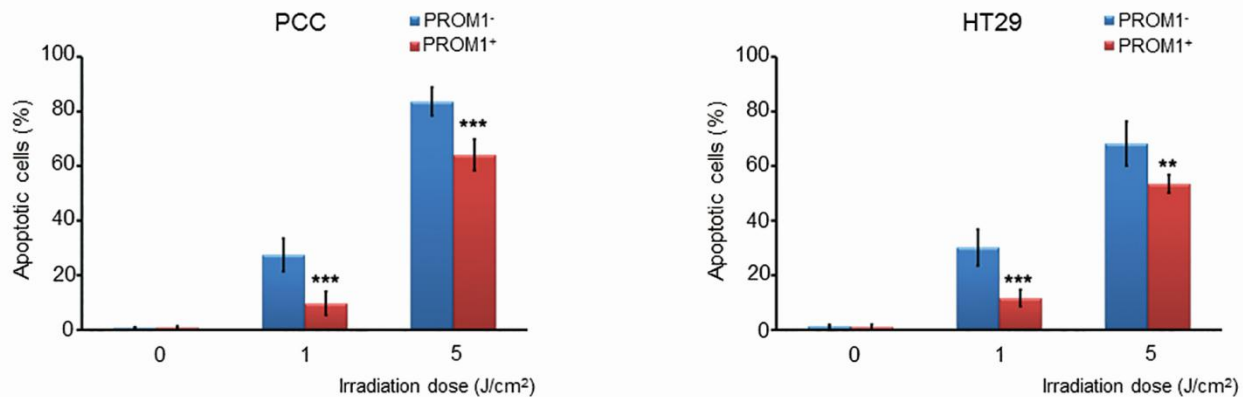

**Figure S2.** PpIX-mediated PDT causes significantly less apoptosis in CSCs compared to non-CSCs. Graphic representation of the percentages of apoptotic PROM1/CD133<sup>+</sup> and PROM1/CD133<sup>-</sup> cells after PpIX-mediated PDT at various light doses. These results are expressed as the mean  $\pm$  SE of 3 different experiments. \* $P < 0.05$ ; \*\* $P < 0.01$ ; \*\*\* $P < 0.001$

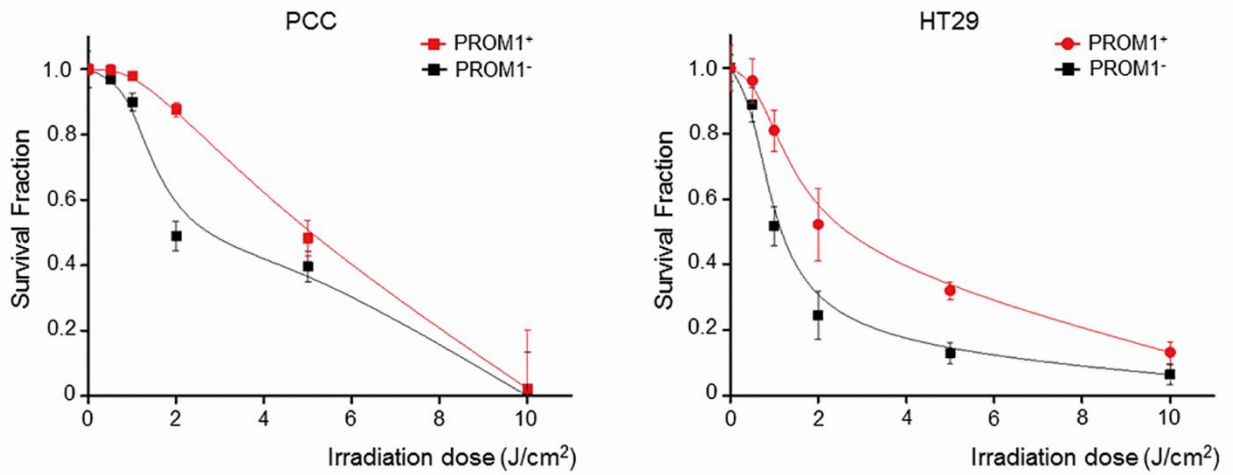

**Figure S3.** CSCs are less sensitive to PpIX-mediated PDT than non-CSCs. PROM1/CD133<sup>+</sup> and PROM1/CD133<sup>-</sup> cells from PCCs and HT29 cell lines were plated in 2 ml of medium at a concentration of 500 cells/well in 6-well plates and treated with PDT at various light doses. The treated cells were incubated at 37 °C for 8 to 10 days to allow colony formation. Colonies were fixed with methanol and stained with 0.5% crystal violet. Colonies having more than 50 cells were counted, and the plating efficiency (PE) and surviving fraction (S.F.) were calculated. Each condition was performed at least in triplicate.

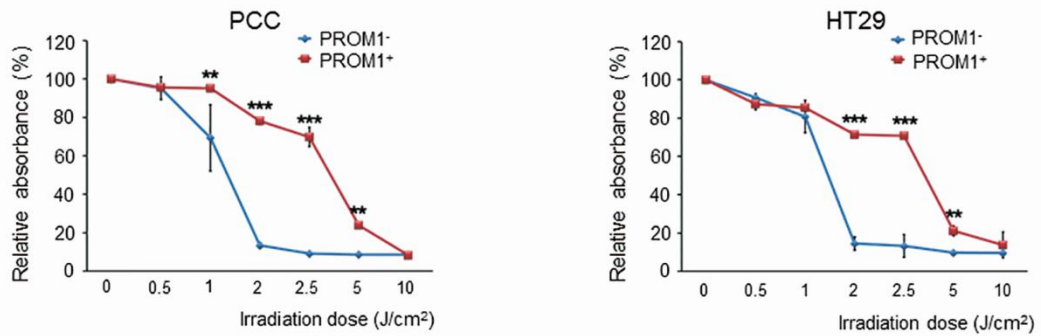

**Figure S4.** CSCs are more resistant to PpIX-mediated PDT compared to non-CSCs. Following the administration of PpIX-mediated PDT at various light doses, the PROM1/CD133<sup>+</sup> and PROM1/CD133<sup>-</sup> cytotoxicity was evaluated using the WST-1 assay. Cytotoxicity of treated cells was expressed as a percentage of the control. These results are expressed as the mean  $\pm$  SE of 3 different experiments. \* $P < 0.05$ ; \*\* $P < 0.01$ ; \*\*\* $P < 0.001$

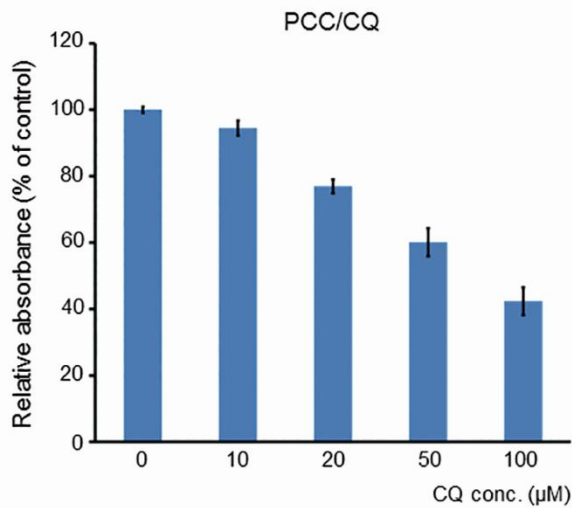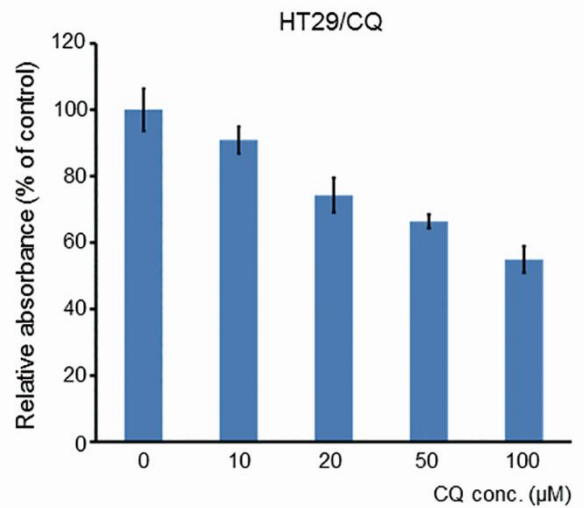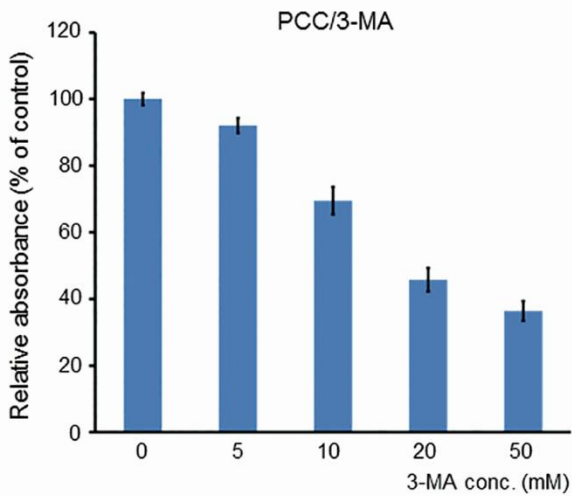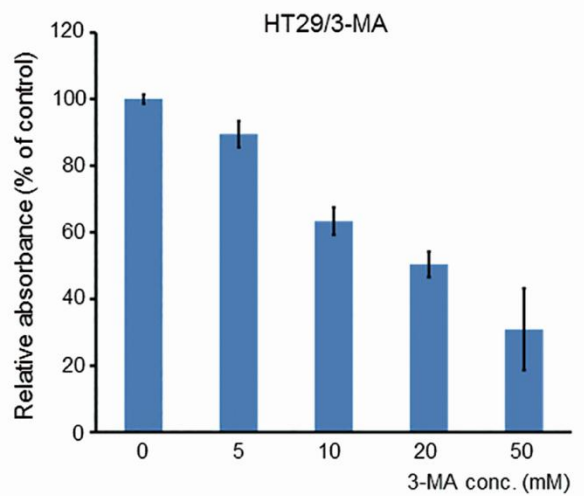

**Figure S5.** The optimal concentrations of autophagy inhibitors that effectively suppress autophagy but only with minimal cytotoxicity. PCCs and HT29 cells were treated with increasing concentrations of CQ and 3-MA for 72 h. Then, cytotoxicity was measured using the WST-1 assay. Cytotoxicity of treated cells was expressed as a percentage of the control. Each condition was performed at least in triplicate.

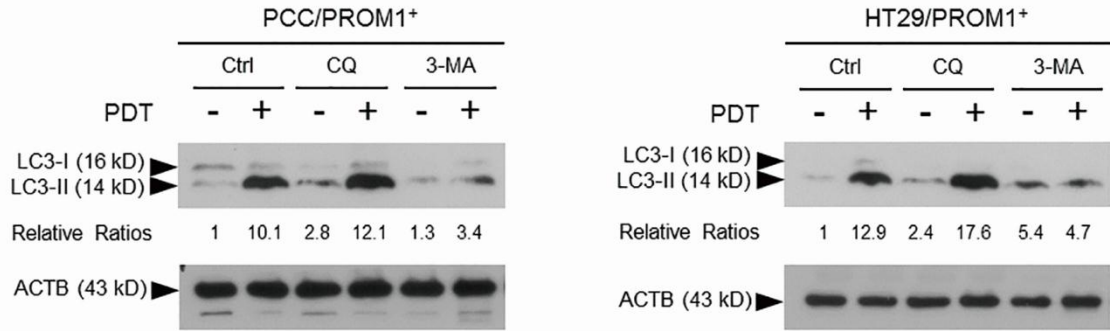

**Figure S6.** Effects of autophagy inhibitors on PDT-induced LC3-II accumulation in CSCs. The PROM1/CD133<sup>+</sup> cells were treated with CQ (10  $\mu$ M) or 3-MA (5 mM) for 24 h, followed by PDT (1.3 J/cm<sup>2</sup>). Cell lysates were harvested at 24 h post-PDT, and the expression of LC3 was detected by western blot. The band intensities on films were analyzed by ImageJ software. The relative amounts of LC3-II were quantified as ratios to ACTB, indicated underneath each gel. The relative ratio of LC3-II in Ctrl without PDT treatment is arbitrarily presented as 1.

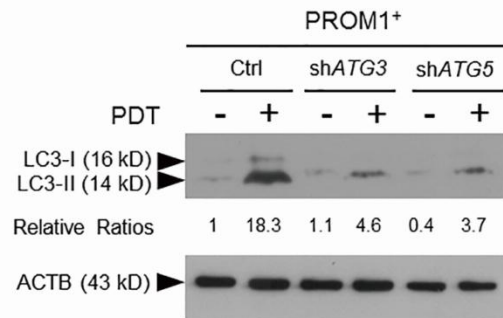

**Figure S7.** Effects of *ATG* silencing on PDT-induced LC3-II accumulation in CSCs. The PROM1/CD133<sup>+</sup> PCCs that expressed shATG3 or shATG5 were treated with PDT (1.3 J/cm<sup>2</sup>). Cell lysates were harvested at 24 h post-PDT, and the expression of LC3 was detected by western blot. The band intensities on films were analyzed by ImageJ software. The relative amounts of LC3-II were quantified as ratios to ACTB, indicated underneath each gel. The relative ratio of LC3-II in Ctrl without PDT treatment is arbitrarily presented as 1.
